# Supplementary material
Source: publisher figshare collection journal article supplement (https://acs.figshare.com/ndownloader/files/3898810)
Supplement: Supplementary file 1 [file 3898810]

# Uptake of Contaminants of Emerging Concern by the Bivalves *Anodonta californiensis* and *Corbicula fluminea*

Niveen S. Ismail<sup>1,2</sup>, Claudia E. Müller<sup>1,2</sup>, Rachel R. Morgan<sup>1,2</sup>, Richard G. Luthy<sup>1,2\*</sup>

<sup>1</sup> Department of Civil and Environmental Engineering, Stanford University, Stanford, California  
94305, United States

<sup>2</sup> ReNUWIt Engineering Research Center

## **Corresponding Author**

\*Phone: 650-721-2615; fax: 650-725-9720; e-mail: [luthy@stanford.edu](mailto:luthy@stanford.edu)

Number of pages: 11

Number of tables: 7

Number of figures: 5

### **Sample Extraction Details:**

#### *Tissue, Algae/(pseudo)feces, and Filter Samples:*

Samples were freeze dried and homogenized then spiked with 10 µl of a 2 µg/ml surrogate standard mix of triclocarban  $^{13}\text{C}_6$ , ibuprofen- $\text{d}_3$ , clofibric acid- $\text{d}_4$ , diuron- $\text{d}_6$ , propranolol- $\text{d}_7$ , and tris(2-chloroethyl)phosphate- $\text{d}_{12}$ . A blank sample containing methanol and the internal standard was also prepared with each batch of samples extracted. Samples were extracted by adding 2 ml methanol, vortexing, sonicating for 10 min and shaking for a minimum of 2 hours. After shaking, the samples were centrifuged for 20 minutes at 4700 rpm. The supernatant was transferred to a pre-cleaned 15 ml centrifuge tube and the extraction was repeated two times. The extract was then concentrated to 1ml under nitrogen gas. As the extracts contained lipids and other matrices, they were subjected to a solid phase extraction (SPE) step for clean-up. In preparation for use with hydrophilic-lipophilic balance (HLB cartridges, Waters Corp, Millford, MA) SPE, 14 ml of water was added to the concentrated extract for tissue and filter samples.

For algae and (pseudo)feces samples containing chlorophyll, an additional liquid-liquid extraction with hexane was completed prior to use with HLB cartridges. Chlorophyll a containing extracts were also concentrated to 1 ml with nitrogen then 0.2 ml of water and 1ml of hexane were added. After shaking for 2 hours the samples were centrifuged at 4700 rpm for 20 minutes and the hexane layer containing chlorophyll a was discarded and 14 ml of MilliQ water was added to the remaining methanol fraction.

A solid phase extraction vacuum manifold was utilized with the 500 mg HLB cartridges. The HLB cartridges were preconditioned with 5 ml MTBE, 5ml methanol, and 5 ml MilliQ water. Samples were loaded by gravity only and the sample container was washed with 5ml of MilliQ water, which was also added to the cartridges. The cartridges were then dried under vacuum for 1 hour. After drying, the cartridges were eluted by gravity with 6 ml of 50/50 (v/v) MTBE/methanol followed by 7 ml of methanol. The 7 ml methanol was used to wash the sample container to remove any contaminant sorbed to the wall then used for cartridge elution then used in the SPE cartridges. The vacuum was used to recover any remaining solvent.

The extracts were then vortexed and concentrated to 0.5 ml under nitrogen. An additional 0.2 ml of methanol was added to the concentrated samples followed by 0.3ml of water. Then 5 µl of 500 ng/ml of internal standard TCC- $\text{d}_7$  was added. The samples were vortexed and transferred to 1.5 ml autosampler vials for analysis.

#### *Water Samples:*

Water samples did not undergo preliminary extraction steps and were extracted directly via HLB cartridges as described above.

#### *LC-MS/MS analysis:*

Samples were analyzed after extraction and cleanup utilizing an LC-MS/MS. A Shimadzu LC-10ADVP system (Columbia, MD) and AB Sciex API 3000 mass spectrometer (Framingham, MA) were utilized. Analytical procedure was dependent on analysis in positive mode or negative mode for the mass spectrometer. A Targa C18 column (40 x 2.1mm, 5 µm particles) fitted with a C18 guard column (Haipack Targa C18, 20 x 2.1mm, 5 µm) was utilized (Higgins Analytical, Mountain View, CA) and a sample volume of 10 µL was injected onto the C18 column for all samples.

For positive mode, liquid chromatography was performed using aqueous formic acid (0.04 mM) and methanol binary gradient at a flow rate of 0.3 mL/min. Initial methanol concentration was 10% then ramped up to 98% over 8 min, held at 98% for 1 min and reverted to 10% at 9.5 min followed by a 4.5 min hold. For negative ESI mode, liquid chromatography was performed using aqueous ammonium acetate (2mM) and methanol binary gradient at a flow rate of 0.3 mL/min. Initial methanol concentration was 5% then ramped up to 98% over 8 min, held at 98% for 1 min and reverted to 5% at 9.5 min followed by a 4.5 min hold. Table S3 lists the primary and secondary transitions and the limit of quantification (LOQ) for each compound. The LOQ was calculated based on the lowest value in the calibration curve with an accuracy of between 80-120%. The LOQ values presented in Table S3 for aqueous values apply for water, (pseudo)feces, and algae samples.

**Table S1. Test Chemicals and their properties**

| Name           | Class                    | Log K <sub>ow</sub> | pKa | Log D <sub>ow</sub> (pH 6.8) |
|----------------|--------------------------|---------------------|-----|------------------------------|
| Clofibric Acid | Pharmaceutical/Herbicide | 2.7                 | 3.2 | -0.9                         |
| Diuron         | Herbicide                | 2.68                | N/A | 2.68                         |
| Ibuprofen      | Pharmaceutical           | 2.9                 | 4.5 | 0.6                          |
| Propranolol    | Pharmaceutical           | 3.48                | 9.5 | 0.8                          |
| TCC            | Biocide                  | 4.9                 | N/A | 4.9                          |
| TCEP           | Flame-Retardant          | 1.44                | N/A | 1.44                         |
| TDCPP          | Flame Retardant          | 3.65                | N/A | 3.65                         |

**Table S2. Parameters for flow through experiment for *C. fluminea***

|                                         |                                                   |
|-----------------------------------------|---------------------------------------------------|
| Number of bivalves                      | 49                                                |
| Duration: Exposure/Depuration           | 28 days/6 days                                    |
| Water volume in Tank                    | 18 L                                              |
| Hydraulic Residence Time (days)         | 1                                                 |
| Water sample intervals/location         | Daily/Control + Bivalve Inlet/Outlet+ Source Tank |
| Bivalve sampling                        | Every 3 days                                      |
| Number of bivalves at each sample point | 3                                                 |

**Table S3. Limit of Quantification (LOQ) and MS parameters for tested analytes**

| Analyte        | Primary Transition | Secondary Transition | ESI Mode | LOQ Aqueous (ng/L) | LOQ Tissue (ng/g <sub>dw</sub> ) |
|----------------|--------------------|----------------------|----------|--------------------|----------------------------------|
| TCC            | 313 →160           | 313→126              | Negative | 8.5                | 5.3                              |
| Clofibric Acid | 213→127            | 213→85               | Negative | 8.5                | 5.3                              |
| Ibuprofen      | 205→159            | 205→161              | Negative | 8.5                | 5.3                              |
| Propranolol    | 260→116            | 260→183              | Positive | 8.5                | 5.3                              |
| TCEP           | 285→99             | 287→99               | Positive | 8.5                | 5.3                              |
| TDCPP          | 433→99             | 431→99               | Positive | 8.5                | 5.3                              |
| Diuron         | 233→72             | 233→46               | Positive | 17.0               | 10.7                             |

**Table S4. Surrogate recoveries for tested analytes**

| Analyte        | Labeled Standard                  | % Recovery  |       |        |
|----------------|-----------------------------------|-------------|-------|--------|
|                |                                   | Particulate | Water | Tissue |
| TCC            | TCC- <sup>13</sup> C <sub>6</sub> | 48          | 56    | 72     |
| Propranolol    | Propranolol-d <sub>7</sub>        | 67          | 58    | 72     |
| Clofibric Acid | Clofibric acid-d <sub>4</sub>     | 89          | 106   | 95     |
| Ibuprofen      | Ibuprofen-d <sub>3</sub>          | 76          | 93    | 98     |
| Diuron         | Diuron-d <sub>6</sub>             | 42          | 56    | 65     |
| TDCPP          | TCEP-d <sub>12</sub>              | 27          | 53    | 52     |
| TCEP           | TCEP-d <sub>12</sub>              | 38          | 55    | 52     |

**Table S5. Percent recovery determined by spike recovery relative to internal standard for tested analytes**

| Analyte        | % Relative Recovery ± Std. Deviation (n=6) |       |        |
|----------------|--------------------------------------------|-------|--------|
|                | Particulate                                | Water | Tissue |
| TCC            | 79±3                                       | 98±1  | 98±3   |
| Propranolol    | 86±3                                       | 97±2  | 96±2   |
| Clofibric Acid | 98±2                                       | 95±6  | 97±5   |
| Ibuprofen      | 92±3                                       | 88±4  | 97±7   |
| Diuron         | 87±10                                      | 92±6  | 88±11  |
| TDCPP          | 76±13                                      | 91±11 | 71±9   |
| TCEP           | 75±4                                       | 89±17 | 72±3   |

**Table S6. Repeatability for tested analytes reported as relative standard deviation**

| Analyte        | % Relative Standard Deviation (n=10) |
|----------------|--------------------------------------|
| TCC            | 9                                    |
| Propranolol    | 2                                    |
| Clofibric Acid | 11                                   |
| Ibuprofen      | 13                                   |
| Diuron         | 11                                   |
| TDCPP          | 6                                    |
| TCEP           | 7                                    |

**Table S7. Mean mass recovery values (%) and standard deviations from mass balance experiments (n=6)**

| Analyte        | Water           |                  | Tissue          |                  | (Pseudo)feces   |                  |
|----------------|-----------------|------------------|-----------------|------------------|-----------------|------------------|
|                | <i>Anodonta</i> | <i>Corbicula</i> | <i>Anodonta</i> | <i>Corbicula</i> | <i>Anodonta</i> | <i>Corbicula</i> |
| TCC            | 11±2%           | 8±2%             | 36±2%           | 28±2%            | 22±8%           | 28±1%            |
| Propranolol    | 39±1%           | 43±3%            | 34±4%           | 18±1%            | 5±1%            | 2±1%             |
| TDCPP          | 39±13%          | 42±18%           | 2±3%            | 5±3%             | 9±3%            | 8±6%             |
| Diuron         | 40±10%          | 48±7%            | 0%              | 2±2%             | 24±7%           | 28±8%            |
| Clofibric Acid | 62±11%          | 74±14%           | 3±4%            | 13±10%           | 3±2%            | 3±3%             |
| TCEP           | 82±6%           | 80±4%            | 2±2%            | 5±5%             | 2±2%            | 7±3%             |
| Ibuprofen      | 88±7%           | 73±19%           | 3±2%            | 0%               | 0%              | 0%               |

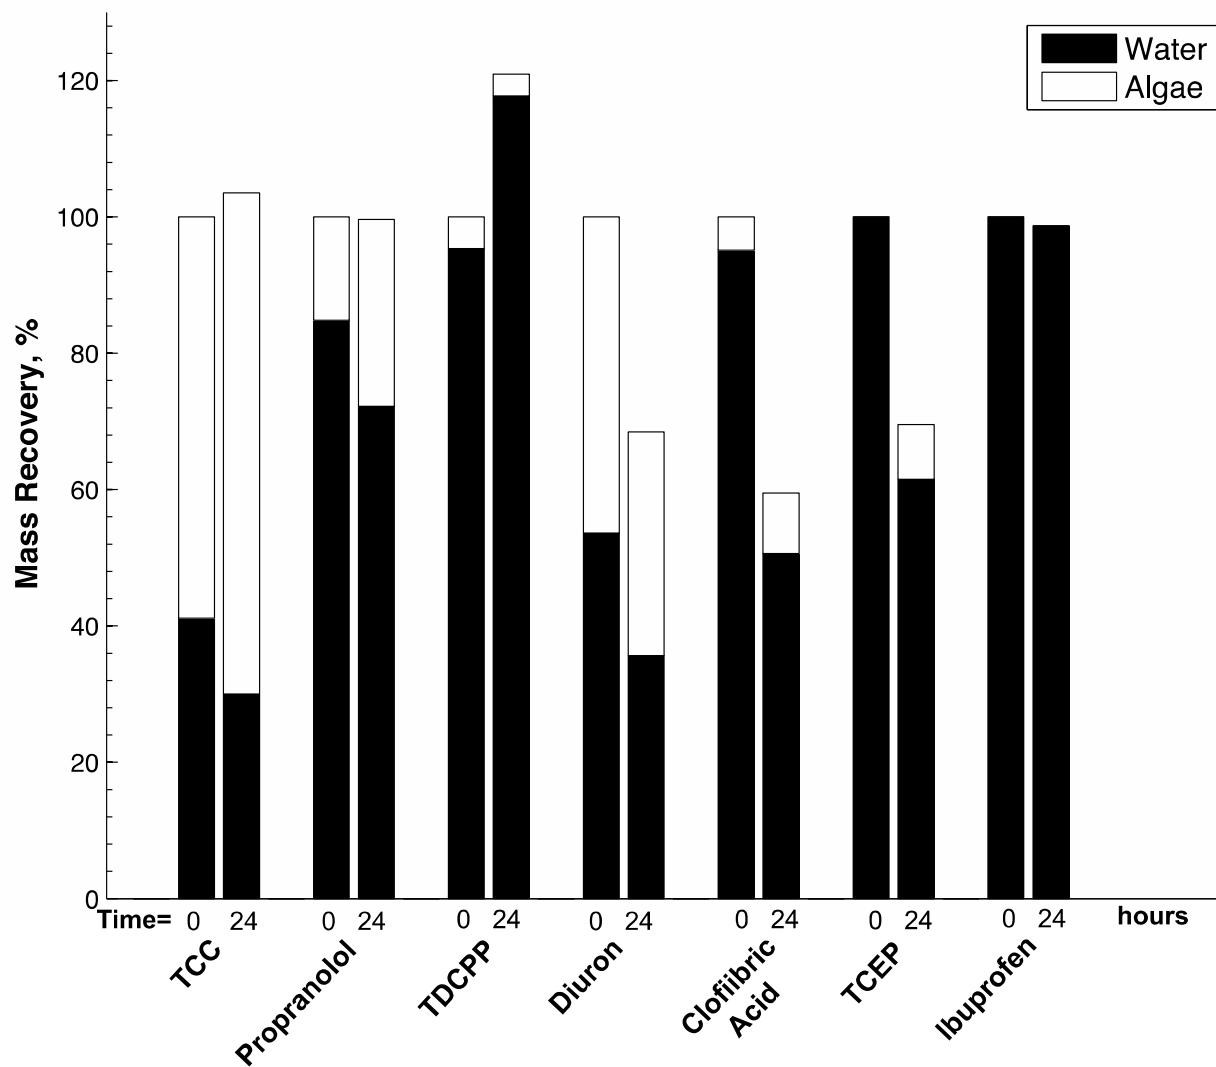

**Figure S1.** Distribution of analytes (initial spike concentration of 250 ng/L) between water and algae in control beakers at the start (time=0 hours) and end (t=24 hours) of batch experiment

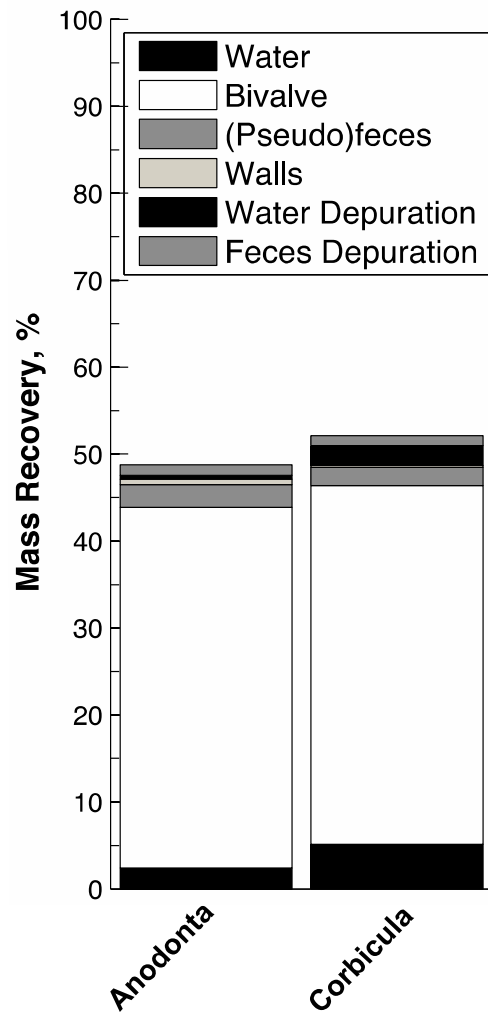

**Figure S2.** Average mass distribution of TCC spiked in water without particulate matter after 24-hour batch exposure followed by 72 hours of depuration for *A. californiensis* and *C. fluminea*.



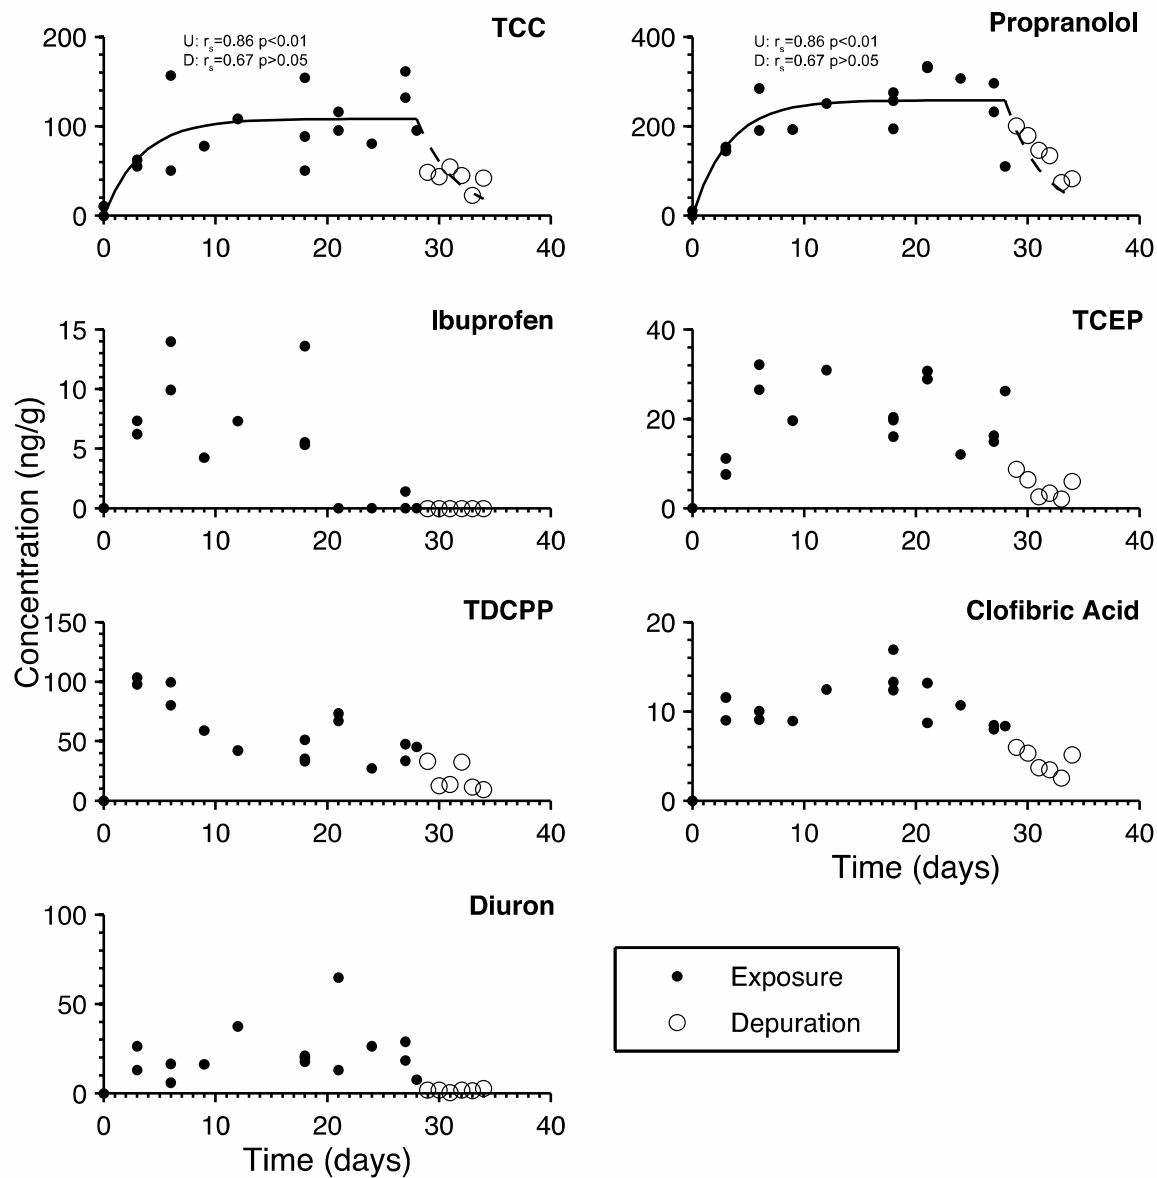

**Figure S3.** Uptake and depuration kinetics of 7 analytes in *C. fluminea*. The solid and dotted lines represent first order kinetics for uptake and depuration respectively and  $r_s$  values show the correlation between experimental and modeled data (U=Uptake and D=Depuration). Concentration is based on dry weight. Fit lines were omitted for compounds with  $r_s$  (spearman's rho) values less than 0.7.

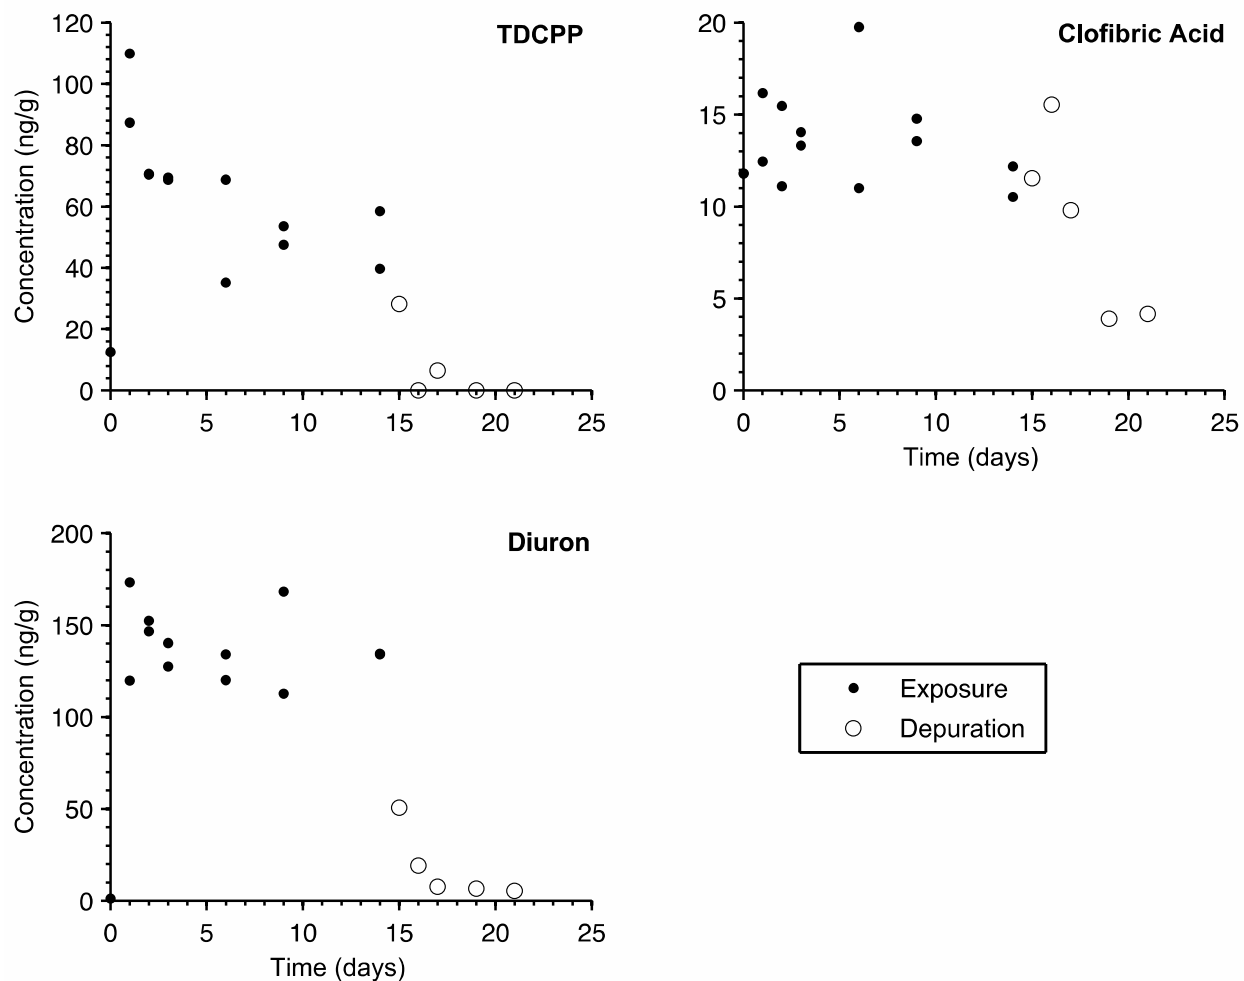

**Figure S4.** Uptake and depuration kinetics of 3 analytes in *A. californiensis*. Concentration is based on dry weight. Fit lines were omitted for compounds with  $r_s$  (spearman's rho) values less than 0.7.

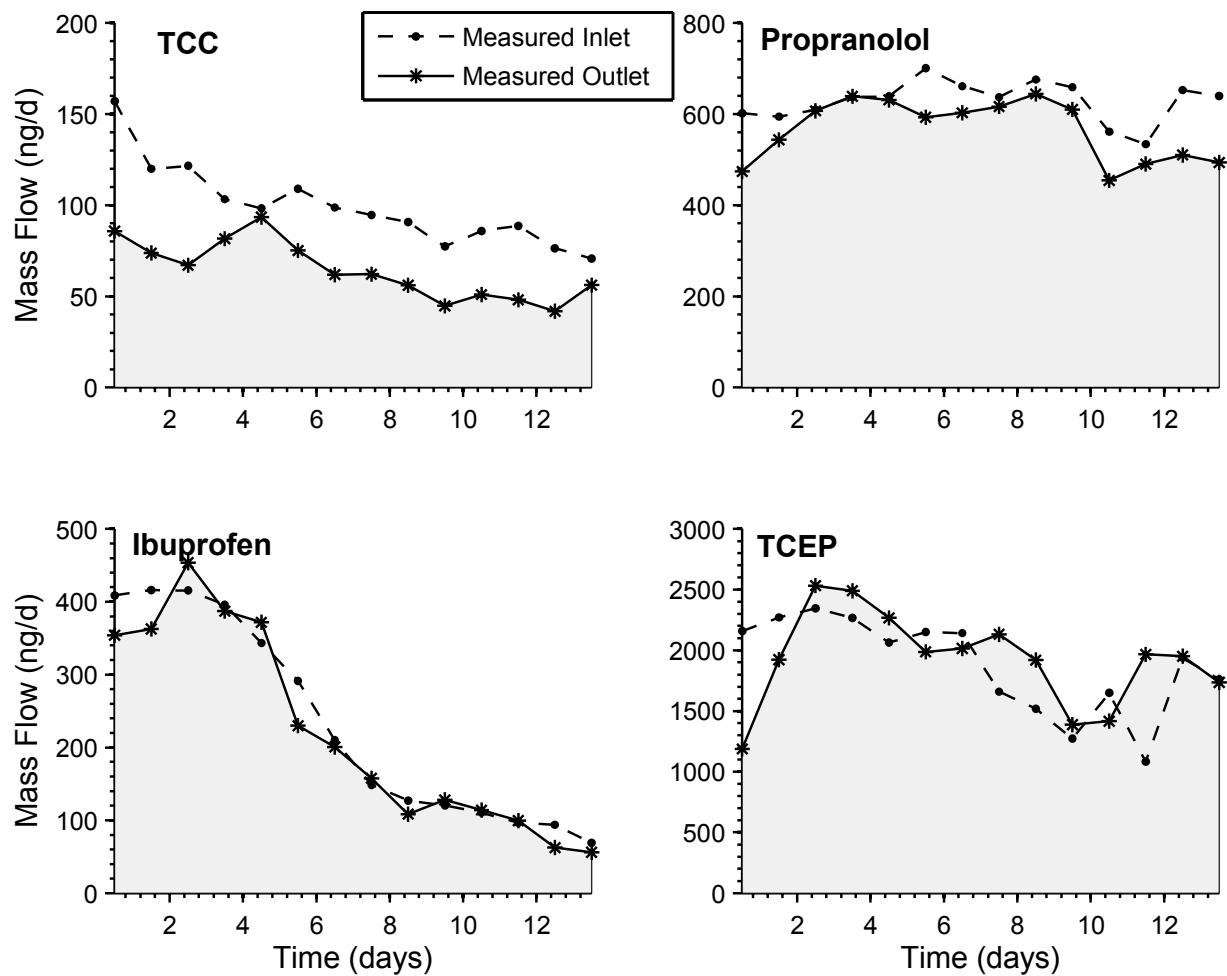

**Figure S5.** Mass flow comparison of water outlet and water inlet for the control tank. Reported inlet and outlet values are based on an average value over two days.
